20. Rowley KL, Mantilla CB, Ermilov LG, Sieck GC: Synaptic distribution and release at rat diaphragm neuromuscular junctions. *J Neurophysiol* 2007; 98: 478-87

21. Ibebunjo C, Strikant CB, Donati F: Morphological correlates of the differential responses of muscles to vecuronium. *Br J Anaesth* 1999; 83:284-91

22. Ibebunjo C, Srikant CC, Donati F: Properties of fibres, end-plates and acetylcholine receptors in the diaphragm, masseter, laryngeal, abdominal and limb muscles in the goat. *Can J Anaesth* 1996; 43:475-84

23. Martyn JAJ, White DA, Gronert GA, Jaffe RS, Ward JM: Up-and-down regulation of skeletal muscle acetylcholine receptors. *ANESTHESIOLOGY* 1992; 76: 822-43

24. Ibebunjo C, Martyn JAJ: Thermal injury induces greater resistance to d-tubocurarine in local rather than in distant muscles in the rat. *Anesth Analg* 2000; 91:1243-9

25. Ibebunjo C, Nosek MT, Itani MS, Martyn JAJ: Mechanisms for the paradoxical resistance to d-tubocurarine during immobilization-induced muscle atrophy. *J Pharmacol Exp Ther* 1997; 283:443-5

26. Dodson BA, Kelly BJ, Braswell LM, Cohen NH: Changes in acetylcholine receptor number in muscle from critically ill patients receiving muscle relaxants: An investigation of the molecular mechanism of prolonged paralysis. *Crit Care Med* 1995; 23:815-21

27. Mantilla LB, Sieck GC: Invited review: Mechanisms underlying motor unit plasticity in the respiratory system. *J Appl Physiol* 2003; 94:1230-41

## ■ ANESTHESIOLOGY REFLECTIONS

### Connell Gas-Oxygen Apparatus, Brass Model War SP

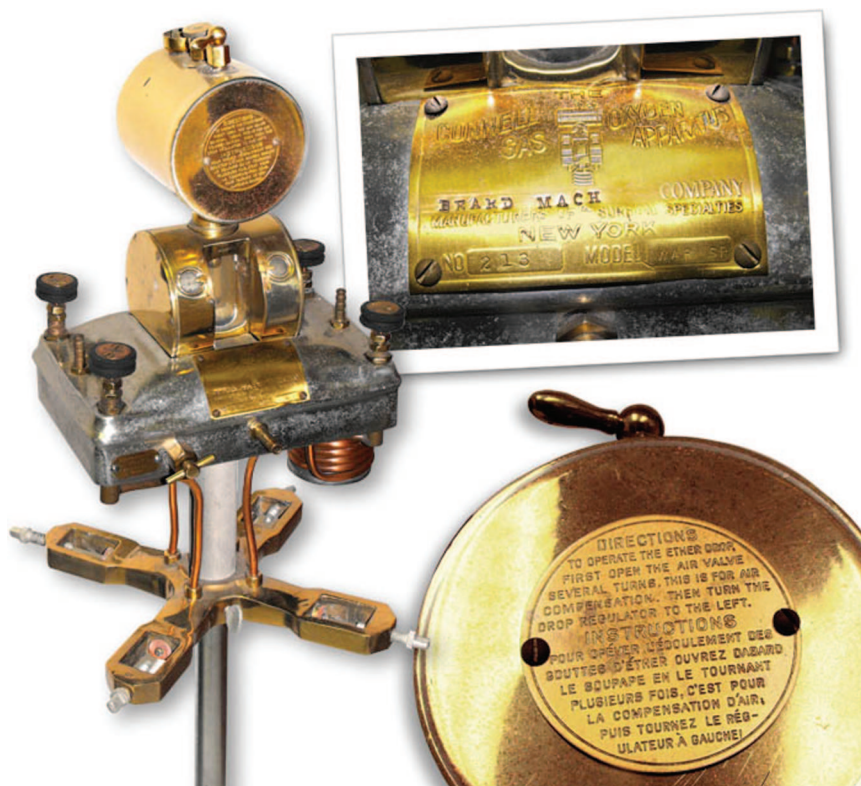

A New York surgeon and manufacturer, Dr. Karl Connell (1878–1941) produced his War SP Model in a brass-and-copper-appointed version (the pretty “Officer’s” one seen here) and in a duller nickel-plated finish (presumably the “Enlisted Man’s” version). Used by Allied Forces in France and Belgium, and neutral services in the Netherlands during World War I, Connell’s “Special” SP featured a round brass plaque listing instructions in both English and French. The War SP Model exemplified the “rotary vane” type of flowmeter which succeeded the Connell Anesthetometer’s piston-type and which preceded the inclined double-ball-bearing flowmeters of later Connell cabinet models. (Copyright © the American Society of Anesthesiologists, Inc. This image appears in the *Anesthesiology Reflections* online collection available at [www.anesthesiology.org](http://www.anesthesiology.org).)

*George S. Bause, M.D., M.P.H., Honorary Curator, ASA’s Wood Library-Museum of Anesthesiology, Park Ridge, Illinois, and Clinical Associate Professor, Case Western Reserve University, Cleveland, Ohio. UJYC@aol.com.*
